# Supplementary material for: Crystallization kinetics of binary colloidal monolayers
Source: Royal Society of Chemistry journal article supplement (doi:10.1039/c6sm01072e), 2016-01-01
Supplement: c6sm01072e3.pdf [file c6sm01072e3.pdf]

**Movie S1. Crystal Growth in a Rapid Quenching Experiment.**

This movie depicts the crystal growth during a rapid quenching process at an effective temperature of  $\tilde{T} \approx 0.081$ , corresponding to a vertical magnetic field strength of  $H = 7.0 Oe$ . Each frame of the movie consists of (left) the raw experimental image and (right) the false-color version showing the crystal domains as identified by image processing. Gray particles are not a part of crystalline structures. The experimental time is indicated at the top of the movie.

**Movie S2. Free-defects Simulation of Rapid Quenching at  $\tilde{T} \approx 0.076$  (particles confined to a 2-D plane).**

This movie shows a Brownian dynamics simulation of a rapid quenching process at  $\tilde{T} \approx 0.076$ . Magnetic and nonmagnetic are colored gray and red, respectively.
